# Supplementary material for: Altered Metabolic Networks in Mesial Temporal Lobe Epilepsy with Focal to Bilateral Seizures
Source: MDPI journal article supplement (doi:10.3390/brainsci13091239), 2023-08-25
Supplement: s1 [file s1]

Suppl. Table S1. The standardized uptake values ratio of regions of interest using a Harvard-Oxford atlas (Nodes) in the mesial temporal lobe epilepsy patients with and without FBTCS and healthy controls.

|                                                   | FBTCS+ Healthy Controls |          |          |         |
|---------------------------------------------------|-------------------------|----------|----------|---------|
|                                                   | Mean Difference         | CI lower | CI upper | p-value |
| I. Frontal Pole                                   | -0.126                  | -0.207   | -0.046   | <0.001  |
| C. Insular Cortex                                 | -0.104                  | -0.168   | -0.040   | <0.001  |
| I. Insular Cortex                                 | -0.072                  | -0.131   | -0.012   | 0.013   |
| I. Middle Frontal Gyrus                           | -0.112                  | -0.214   | -0.010   | 0.027   |
| I. Inferior Frontal Gyrus, pars triangularis      | -0.140                  | -0.238   | -0.042   | 0.002   |
| I. Temporal Pole                                  | -0.194                  | -0.239   | -0.149   | <0.001  |
| I. Superior Temporal Gyrus, anterior division     | -0.195                  | -0.267   | -0.124   | <0.001  |
| I. Superior Temporal Gyrus, posterior division    | -0.151                  | -0.222   | -0.080   | <0.001  |
| I. Middle Temporal Gyrus, anterior division       | -0.308                  | -0.380   | -0.237   | <0.001  |
| C. Middle Temporal Gyrus, posterior division      | -0.075                  | -0.147   | -0.003   | 0.039   |
| I. Middle Temporal Gyrus, posterior division      | -0.260                  | -0.330   | -0.190   | <0.001  |
| I. Middle Temporal Gyrus, temporooccipital part   | -0.142                  | -0.205   | -0.079   | <0.001  |
| C. Inferior Temporal Gyrus, anterior division     | -0.087                  | -0.166   | -0.008   | 0.025   |
| I. Inferior Temporal Gyrus, anterior division     | -0.271                  | -0.337   | -0.205   | <0.001  |
| I. Inferior Temporal Gyrus, posterior division    | -0.208                  | -0.272   | -0.144   | <0.001  |
| I. Inferior Temporal Gyrus, temporooccipital part | -0.069                  | -0.134   | -0.003   | 0.037   |
| I. Postcentral Gyrus                              | -0.093                  | -0.164   | -0.023   | 0.005   |
| C. Supramarginal Gyrus, posterior division        | -0.103                  | -0.177   | -0.028   | 0.003   |
| I. Supramarginal Gyrus, posterior division        | -0.085                  | -0.163   | -0.007   | 0.029   |
| I. Angular Gyrus                                  | -0.161                  | -0.241   | -0.081   | <0.001  |
| I. Paracingulate Gyrus                            | -0.140                  | -0.233   | -0.046   | 0.001   |

|                                                 |        |        |        |        |
|-------------------------------------------------|--------|--------|--------|--------|
| C. Cingulate Gyrus, anterior division           | -0.100 | -0.180 | -0.019 | 0.010  |
| I. Cingulate Gyrus, anterior division           | -0.128 | -0.207 | -0.048 | <0.001 |
| I. Cingulate Gyrus, posterior division          | -0.204 | -0.291 | -0.116 | <0.001 |
| I. Precuneous Cortex                            | -0.134 | -0.222 | -0.045 | 0.001  |
| I. Frontal Orbital Cortex                       | -0.116 | -0.191 | -0.042 | <0.001 |
| C. Parahippocampal Gyrus, anterior division     | -0.116 | -0.191 | -0.042 | <0.001 |
| I. Parahippocampal Gyrus, anterior division     | -0.088 | -0.134 | -0.041 | <0.001 |
| I. Temporal Fusiform Cortex, anterior division  | -0.151 | -0.203 | -0.099 | <0.001 |
| I. Temporal Fusiform Cortex, posterior division | -0.168 | -0.233 | -0.104 | <0.001 |
| I. Temporal Occipital Fusiform Cortex           | -0.078 | -0.140 | -0.015 | 0.009  |
| I. Frontal Operculum Cortex                     | -0.135 | -0.248 | -0.022 | 0.014  |
| I. Central Opercular Cortex                     | -0.106 | -0.181 | -0.031 | 0.003  |
| I. Parietal Operculum Cortex                    | -0.103 | -0.187 | -0.018 | 0.011  |
| I. Planum Polare                                | -0.137 | -0.201 | -0.073 | <0.001 |
| I. Heschls Gyrus (includes H1 and H2)           | -0.144 | -0.239 | -0.049 | 0.001  |
| I. Planum Temporale                             | -0.187 | -0.269 | -0.105 | <0.001 |
| I. Brain-Stem                                   | -0.037 | -0.073 | -0.002 | 0.037  |
| I. Thalamus                                     | -0.143 | -0.234 | -0.052 | <0.001 |
| C. Caudate                                      | -0.232 | -0.354 | -0.110 | <0.001 |
| I. Putamen                                      | -0.143 | -0.246 | -0.040 | 0.003  |
| I. Hippocampus                                  | -0.095 | -0.142 | -0.049 | <0.001 |
| C. Accumbens                                    | -0.192 | -0.307 | -0.077 | <0.001 |

FBTCS– Healthy Controls

|                           | Mean Differ<br>ence | CI lower | CI upper | p-value |
|---------------------------|---------------------|----------|----------|---------|
| I. Frontal Pole           | -0.133              | -0.213   | -0.052   | <0.001  |
| C. Insular Cortex         | -0.105              | -0.168   | -0.041   | <0.001  |
| I. Insular Cortex         | -0.080              | -0.139   | -0.021   | 0.004   |
| C. Superior Frontal Gyrus | -0.109              | -0.209   | -0.009   | 0.028   |

|                                                                        |        |        |        |        |
|------------------------------------------------------------------------|--------|--------|--------|--------|
| I. Middle Frontal Gyrus                                                | -0.116 | -0.218 | -0.013 | 0.021  |
| I. Inferior Frontal Gyrus, pars triangularis                           | -0.125 | -0.223 | -0.027 | 0.008  |
| I. Precentral Gyrus                                                    | -0.105 | -0.188 | -0.022 | 0.009  |
| I. Temporal Pole                                                       | -0.185 | -0.229 | -0.140 | <0.001 |
| I. Superior Temporal Gyrus, anterior division                          | -0.112 | -0.184 | -0.040 | <0.001 |
| I. Superior Temporal Gyrus, posterior division                         | -0.080 | -0.151 | -0.009 | 0.022  |
| I. Middle Temporal Gyrus, anterior division                            | -0.226 | -0.297 | -0.154 | <0.001 |
| I. Middle Temporal Gyrus, posterior division                           | -0.150 | -0.220 | -0.079 | <0.001 |
| I. Middle Temporal Gyrus, temporooccipital part                        | -0.064 | -0.127 | -0.001 | 0.049  |
| I. Inferior Temporal Gyrus, anterior division                          | -0.201 | -0.267 | -0.135 | <0.001 |
| I. Inferior Temporal Gyrus, posterior division                         | -0.142 | -0.206 | -0.078 | <0.001 |
| C. Postcentral Gyrus                                                   | -0.102 | -0.175 | -0.029 | 0.003  |
| I. Postcentral Gyrus                                                   | -0.116 | -0.186 | -0.045 | <0.001 |
| C. Superior Parietal Lobule                                            | -0.091 | -0.169 | -0.013 | 0.016  |
| C. Supramarginal Gyrus, posterior division                             | -0.076 | -0.151 | -0.002 | 0.042  |
| I. Angular Gyrus                                                       | -0.083 | -0.163 | -0.003 | 0.039  |
| C. Juxtapositional Lobule Cortex (formerly Supplementary Motor Cortex) | -0.144 | -0.246 | -0.042 | 0.003  |
| I. Juxtapositional Lobule Cortex (formerly Supplementary Motor Cortex) | -0.191 | -0.297 | -0.085 | <0.001 |
| I. Paracingulate Gyrus                                                 | -0.171 | -0.265 | -0.078 | <0.001 |
| C. Cingulate Gyrus, anterior division                                  | -0.137 | -0.218 | -0.057 | <0.001 |
| I. Cingulate Gyrus, anterior division                                  | -0.172 | -0.251 | -0.093 | <0.001 |
| C. Cingulate Gyrus, posterior division                                 | -0.107 | -0.192 | -0.021 | 0.009  |
| I. Cingulate Gyrus, posterior division                                 | -0.219 | -0.307 | -0.132 | <0.001 |
| C. Precuneous Cortex                                                   | -0.095 | -0.189 | -0.002 | 0.045  |
| I. Precuneous Cortex                                                   | -0.136 | -0.224 | -0.047 | 0.001  |
| I. Frontal Orbital Cortex                                              | -0.128 | -0.202 | -0.053 | <0.001 |

|                                                 |        |        |        |        |
|-------------------------------------------------|--------|--------|--------|--------|
| C. Parahippocampal Gyrus, anterior division     | -0.067 | -0.125 | -0.008 | 0.020  |
| I. Parahippocampal Gyrus, anterior division     | -0.109 | -0.155 | -0.062 | <0.001 |
| C. Temporal Fusiform Cortex, anterior division  | -0.063 | -0.125 | -0.001 | 0.043  |
| I. Temporal Fusiform Cortex, anterior division  | -0.147 | -0.199 | -0.094 | <0.001 |
| I. Temporal Fusiform Cortex, posterior division | -0.148 | -0.212 | -0.083 | <0.001 |
| I. Temporal Occipital Fusiform Cortex           | -0.067 | -0.129 | -0.004 | 0.032  |
| I. Central Opercular Cortex                     | -0.104 | -0.179 | -0.030 | 0.003  |
| I. Parietal Operculum Cortex                    | -0.111 | -0.195 | -0.026 | 0.006  |
| I. Planum Polare                                | -0.109 | -0.173 | -0.045 | <0.001 |
| I. Heschls Gyrus (includes H1 and H2)           | -0.123 | -0.218 | -0.028 | 0.007  |
| I. Planum Temporale                             | -0.140 | -0.222 | -0.058 | <0.001 |
| I. Brain-Stem                                   | -0.041 | -0.076 | -0.005 | 0.019  |
| I. Thalamus                                     | -0.126 | -0.217 | -0.035 | 0.004  |
| C. Caudate                                      | -0.241 | -0.363 | -0.119 | <0.001 |
| C. Putamen                                      | -0.154 | -0.254 | -0.055 | <0.001 |
| I. Putamen                                      | -0.205 | -0.308 | -0.102 | <0.001 |
| C. Pallidum                                     | -0.086 | -0.166 | -0.005 | 0.033  |
| I. Hippocampus                                  | -0.106 | -0.152 | -0.059 | <0.001 |
| C. Accumbens                                    | -0.204 | -0.319 | -0.089 | <0.001 |

FBTCS+ FBTCS–

|                                                    | Mean Differ<br>ence | CI lower | CI upper | p-value |
|----------------------------------------------------|---------------------|----------|----------|---------|
| I. Superior Temporal Gyrus, anterior division      | -0.084              | -0.157   | -0.010   | 0.021   |
| I. Middle Temporal Gyrus, anterior division        | -0.083              | -0.156   | -0.009   | 0.022   |
| I. Middle Temporal Gyrus, posterior division       | -0.110              | -0.183   | -0.038   | 0.001   |
| I. Middle Temporal Gyrus, temporooccipital<br>part | -0.079              | -0.143   | -0.014   | 0.012   |
| I. Inferior Temporal Gyrus, anterior division      | -0.070              | -0.137   | -0.002   | 0.042   |
| I. Inferior Temporal Gyrus, posterior division     | -0.066              | -0.132   | -0.001   | 0.047   |

---

Statistical significance was evaluated by one way ANOVA with Bonferroni post hoc test for multiple comparisons. The mean difference is significant at the 0.05 level.

FBTCS: focal to bilateral tonic-clonic seizures; CI: confidence interval; I: ipsilateral hemisphere; C: contralateral hemisphere.

\*Only significant values are included in the table.
